# Preoperative Frailty Assessment: An Opportunity to Add Value to Perioperative Care

Daniel I. McIsaac, M.D., M.P.H., F.R.C.P.C.

Anesthesiologists routinely assess and provide perioperative care for patients who are older and vulnerable to adverse postoperative outcomes.<sup>1</sup> For many older patients, this vulnerability can be traced back to the presence of frailty, a multidimensional syndrome related to the accumulation of age- and disease-related deficits.<sup>2,3</sup> Accordingly, multiple guidelines recommend that frailty be assessed in all older people presenting for surgery.<sup>4,5</sup> In this issue of *ANESTHESIOLOGY*, Canales *et al.* investigate whether point-of-care ultrasound imaging can help to identify older patients with frailty.<sup>6</sup> While well-studied clinical tools exist to assess frailty, assessment is not routinely performed.<sup>7</sup> In some circumstances, especially where patients are acutely unwell, clinical assessment may not be feasible. Therefore, the authors hypothesize that ultrasound assessment could be a useful tool to address the gap between guidelines and practice.<sup>7,8</sup>

Fundamental to the hypothesis tested by Canales *et al.* is a tension present in many parts of anesthesiology practice: As new techniques and technologies emerge, is new and more always better? Or could anesthesiologists and our patients benefit from a less-is-more approach? Point-of-care ultrasound has quickly emerged as an area of interest for many anesthesiologists, used for volume assessment, cardiopulmonary evaluation, airway assessment, and other indications.<sup>9</sup> Could ultrasound also emerge as a quick and easy approach to assessing a multidimensional geriatric syndrome with substantial implications on prognostication, optimization, and care planning? Or could the training, equipment and attention required to perform and interpret point-of-care ultrasound studies potentially detract from providing efficient and patient-centered care? Perhaps the

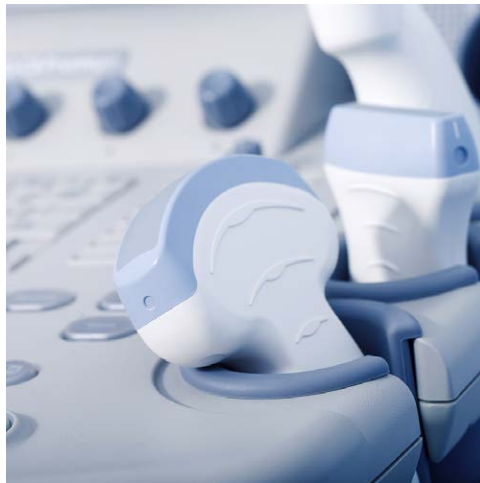

**“[Can] point-of-care ultrasound imaging help to identify older patients with frailty?”**

right answer lies somewhere in between.

In addressing this tension, let's consider what we know about frailty assessment. First, although no agreement exists on a single definition of frailty, widespread agreement exists that frailty is a multidimensional syndrome that exists on a continuum.<sup>10</sup> While no instrument is considered the accepted standard for frailty assessment, a handful of well-studied instruments exist for perioperative clinicians to choose from. These include the Fried Phenotype (as used by Canales *et al.*), the Clinical Frailty Scale, the Frailty Index, the Edmonton Frail Scale, and the Risk Analysis Index, which all allow frailty to be assessed across multiple domains (*e.g.*, physical, cognitive, physiologic, nutrition, and others), assigning scores that can vary across a meaningful range.<sup>11</sup> Furthermore, among these tools, the Clinical Frailty Scale and Risk Analysis Index can be applied in less than 2 min without the need for additional space, equipment, or subassessment scoring. This means that anesthesiologists already have access to tools that directly assess the presence of frailty, that can be used to assign an information-rich continuous score, and that can be feasibly and efficiently performed in a preoperative clinic or at the bedside with a stable, cognitively intact individual.

When considering an ultrasound-based approach to frailty assessment, one must acknowledge the multiple steps required to move conceptually and practically from imaging to frailty diagnosis. Conceptually, chronic disorders of muscle quality and quantity, which ultrasound imaging capture, are specific to assessment of sarcopenia,<sup>12</sup> a condition long understood to be related to, but distinct from, frailty.<sup>13</sup> Practically, the techniques used to determine the diagnostic accuracy of these muscle measurements in identifying

Image: Adobe Stock.

This editorial accompanies the article on p. 268. This editorial has a related Infographic on p. A15. This editorial has an audio podcast.

Accepted for publication October 27, 2021. From the Department of Anesthesiology & Pain Medicine and the School of Epidemiology & Public Health, University of Ottawa, Ottawa, Ontario, Canada; the Department of Anesthesiology & Pain Medicine, The Ottawa Hospital, Ottawa, Ontario, Canada; and the Clinical Epidemiology Program, The Ottawa Hospital Research Institute, Ottawa, Ontario, Canada.

Copyright © 2021, the American Society of Anesthesiologists. All Rights Reserved. *Anesthesiology* 2022; 136:255–7. DOI: 10.1097/ALN.0000000000004080

frailty require identifying cutoffs for each measurement, which then reflect frailty as a binary diagnosis that is present or absent. This can lead to loss of prognostic information available when the dose–response relationship between frailty and outcome risk is considered. However, as stated by Canales *et al.*, despite these limitations, anesthesiologists routinely encounter patients in the setting of trauma, critical illness, and cognitive dysfunction where an objective bedside imaging assessment may be the only option available. Furthermore, although distinct from frailty, sarcopenia is also a strong risk factor for adverse postoperative outcomes.<sup>14</sup>

Ultimately, however, practitioners will most likely be interested in whether ultrasound accurately identifies those who will truly have frailty based on the Fried Phenotype. At this point, the data provided by Canales *et al.* represent an important step toward answering this question definitively. Their findings suggest that ultrasound measurements may provide moderate discrimination between those with and without frailty, although due to wide CIs, the authors rightly suggest these data require verification in a larger and more-detailed study. Using their estimated likelihood ratios, which were also bounded by wide confidence limits, a positive ultrasound screen results in a positive likelihood ratio of approximately 2, which is considered somewhat useful when one is interested in ruling in a diagnosis.<sup>15</sup> When looking to rule out frailty, muscle depth and circumference both had negative likelihood ratios of approximately 0.4, again considered to be somewhat useful diagnostic measures. For anesthesiologists, this means that if the pretest probability is high (in other words, if frailty in your practice population is prevalent), a positive ultrasound screen would meaningfully increase the likelihood that your patient truly has frailty. For example, in hip fracture patients, frailty is present in 50%,<sup>16</sup> meaning that a positive ultrasound result would increase the probability that your patient has frailty to greater than 66%. In contrast, for low frailty prevalence populations, such as elective hip replacement (approximately 10%),<sup>17</sup> ultrasound measures may be better for ruling frailty out, as a negative result would decrease the likelihood of frailty in a given patient to 4%.

So, for the practicing anesthesiologist, how do we harness the tools developed, and in development, to routinely identify vulnerable older people with frailty and attempt to improve their outcomes? For the majority of our older patients, we should work to incorporate one of the well-studied multidimensional assessment tools into our perioperative processes and systems of care. Knowing that a patient has frailty, and communicating this with the perioperative team, provides unique information that can potentially improve outcomes intrinsically,<sup>18</sup> or provide an extrinsic roadmap to optimization.<sup>19</sup> For patients where such assessments are not feasible, we should build on the work of Canales *et al.* to understand with greater certainty the value of ultrasound assessment, especially for some of our

highest-risk patients who cannot engage in clinical frailty assessment. Ultimately, anesthesiologists' unique perioperative knowledge and skill set position us to increase the value of perioperative care for older people. Frailty assessment is a key aspect of this value proposition, and one that will be best addressed through complimentary approaches applied to the unique circumstances of each of our patients.

### Research Support

Dr. McIsaac receives salary support from the Ottawa Hospital Department of Anesthesiology & Pain Medicine, Ottawa, Ontario, Canada, and a Research Chair from the Faculty of Medicine, University of Ottawa, Ottawa, Ontario, Canada.

### Competing Interests

The author is not supported by, nor maintains any financial interest in, any commercial activity that may be associated with the topic of this article.

### Correspondence

Address correspondence to Dr. McIsaac: [dmcisaac@toh.on.ca](mailto:dmcisaac@toh.on.ca)

### References

1. Fowler AJ, Abbott TEF, Prowle J, Pearse RM: Age of patients undergoing surgery. *Br J Surg* 2019; 106:1012–8
2. Fried LP, Tangen CM, Walston J, Newman AB, Hirsch C, Gottdiener J, Seeman T, Tracy R, Kop WJ, Burke G: Frailty in older adults: Evidence for a phenotype. *J Gerontol Med Sci* 2001; 56:146–57
3. Rockwood K, Song X, MacKnight C, Bergman H, Hogan DB, McDowell I, Mitnitski A: A global clinical measure of fitness and frailty in elderly people. *CMAJ* 2005; 173:489–95
4. Chow WB, Rosenthal RA, Merkow RP, Ko CY, Esnaola NF; American College of Surgeons National Surgical Quality Improvement Program; American Geriatrics Society: Optimal preoperative assessment of the geriatric surgical patient: A best practices guideline from the American College of Surgeons National Surgical Quality Improvement Program and the American Geriatrics Society. *J Am Coll Surg* 2012; 215:453–66
5. Alvarez-Nebreda ML, Bentov N, Urman RD, Setia S, Huang JC, Pfeifer K, Bennett K, Ong TD, Richman D, Gollapudi D, Alec Rooke G, Javedan H: Recommendations for preoperative management of frailty from the Society for Perioperative Assessment and Quality Improvement (SPAQI). *J Clin Anesth* 2018; 47:33–42
6. Canales C, Mazor E, Coy H, Grogan TR, Duval V, Raman S, Cannesson M, Singh SP: Preoperative point-of-care ultrasound to identify frailty and predict

- postoperative outcomes: A diagnostic accuracy study. *ANESTHESIOLOGY* 2022; 136:268–78
7. Deiner S, Fleisher LA, Leung JM, Peden C, Miller T, Neuman MD: Adherence to recommended practices for perioperative anesthesia care for older adults among US anesthesiologists: Results from the ASA Committee on Geriatric Anesthesia-Perioperative Brain Health Initiative ASA member survey. *Perioper Med* 2020; 9:4–11
  8. Eamer G, Gibson JA, Gillis C, Hsu AT, Krawczyk M, MacDonald E, Whitlock R, Khadaroo RG: Surgical frailty assessment: A missed opportunity. *BMC Anesthesiol* 2017; 17:99
  9. McCormick TJ, Miller EC, Chen R, Naik VN: Acquiring and maintaining point-of-care ultrasound (POCUS) competence for anesthesiologists. *Can J Anaesth* 2018; 65:427–36
  10. Rodríguez-Mañas L, Féart C, Mann G, Viña J, Chatterji S, Chodzko-Zajko W, Gonzalez-Colaço Harmand M, Bergman H, Carcaillon L, Nicholson C, Scuteri A, Sinclair A, Pelaez M, Van der Cammen T, Beland F, Bickenbach J, Delamarche P, Ferrucci L, Fried LP, Gutiérrez-Robledo LM, Rockwood K, Rodríguez Artalejo F, Serviddio G, Vega E: Searching for an operational definition of frailty: A Delphi method based consensus statement. The Frailty Operative Definition-Consensus Conference Project. *J Gerontol A Biol Sci Med Sci* 2013; 68:62–7
  11. Aucoin SD, Hao M, Sohi R, Shaw J, Bentov I, Walker D, McIsaac DI: Accuracy and feasibility of clinically applied frailty instruments before surgery: A systematic review and meta-analysis. *ANESTHESIOLOGY* 2020; 133:78–95
  12. Cruz-Jentoft AJ, Bahat G, Bauer J, Boirie Y, Bruyère O, Cederholm T, Cooper C, Landi F, Rolland Y, Sayer AA, Schneider SM, Sieber CC, Topinkova E, Vandewoude M, Visser M, Zamboni M, Writing Group for the European Working Group on Sarcopenia in Older People 2 (EWGSOP2) and the EG for E: Sarcopenia: Revised European consensus on definition and diagnosis. *Age Ageing* 2019; 48:16–31
  13. Fried LP, Ferrucci L, Darer J, Williamson JD, Anderson G: Untangling the concepts of disability, frailty, and comorbidity: Implications for improved targeting and care. *J Gerontol A Biol Sci Med Sci* 2004; 59:255–63
  14. Jones K, Gordon-Weeks A, Coleman C, Silva M: Radiologically determined sarcopenia predicts morbidity and mortality following abdominal surgery: A systematic review and meta-analysis. *World J Surg* 2017; 41:2266–79
  15. Jaeschke R, Guyatt GH, Sackett DL: Users' guides to the medical literature. III. How to use an article about a diagnostic test. B. What are the results and will they help me in caring for my patients? The Evidence-Based Medicine Working Group. *JAMA* 1994; 271:703–7
  16. Kistler EA, Nicholas JA, Kates SL, Friedman SM: Frailty and short-term outcomes in patients with hip fracture. *Geriatr Orthop Surg Rehabil* 2015; 6:209–14
  17. Evered LA, Vitug S, Scott DA, Silbert B: Preoperative frailty predicts postoperative neurocognitive disorders after total hip joint replacement surgery. *Anesth Analg* 2020; 131:1582–8
  18. Hall DE, Arya S, Schmid KK, Carlson MA, Lavedan P, Bailey TL, Purviance G, Bockman T, Lynch TG, Johanning JM: Association of a frailty screening initiative with postoperative survival at 30, 180, and 365 days. *JAMA Surg* 2017; 152:233–40
  19. McIsaac DI, MacDonald DB, Aucoin SD: Frailty for perioperative clinicians: A narrative review. *Anesth Analg* 2020; 130:1450–60
